# Supplementary material for: Moving beyond the age-depth model paradigm in deep sea palaeoclimate archives: dual radiocarbon and stable isotope analysis on single foraminifera
Source: Copernicus journal article supplement (doi:10.5194/cp-2017-119), 2017-09-29
Supplement: Supplementary file 1 [file cp-2017-119-supplement.zip]

## Supplement S1. Calculation of benthic $\Delta R$

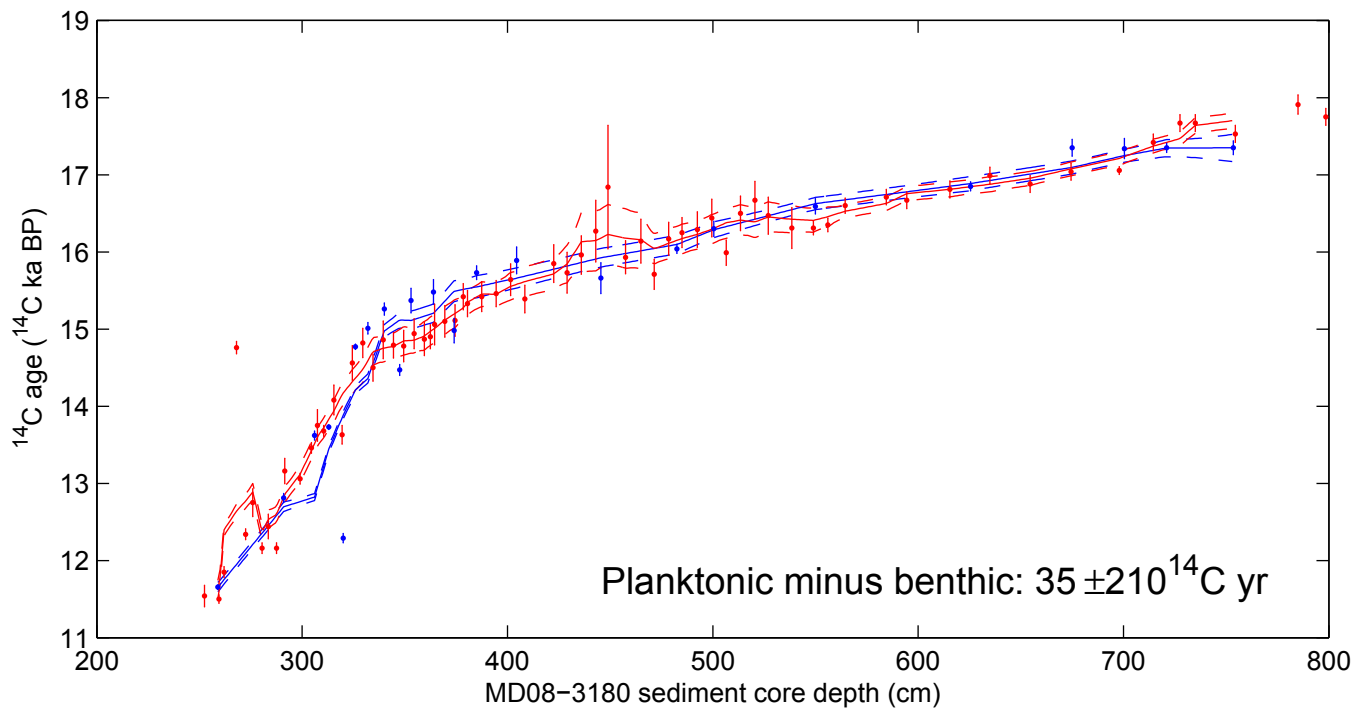

**Fig. S1.** Data from core MD08-3180 (Sarnthein et al., 2015) used to determine planktonic - benthic  $^{14}\text{C}$  age offset for the Azores region. Shown are multi-specimen  $^{14}\text{C}$  determinations and  $1\sigma$  measurement errors from planktonic (red circles and vertical error bars) and benthic foraminifera (blue circles and vertical error bars). The planktonic and benthic  $^{14}\text{C}$  datasets were separately smoothed  $10^4$  times each using five point running mean of probability weighted random samples of each  $^{14}\text{C}$  age normal distribution, after which all smoothing iterations were interpolated to 1 cm resolution for the interval that the two datasets overlap. Median  $^{14}\text{C}$  age (solid red and solid blue lines for planktonic and benthic foraminifera, respectively) and 95.4%  $^{14}\text{C}$  age ranges (dashed red and dashed blue lines for planktonic and benthic foraminifera, respectively) for each 1 cm were subsequently calculated from the  $10^4$  smooths. For every 1 cm, benthic median  $^{14}\text{C}$  age is subtracted from the planktonic median  $^{14}\text{C}$  age, resulting in a  $^{14}\text{C}$  age difference for each 1 cm. The mean and standard deviation of these age differences were subsequently calculated, resulting in a value of  $35 \pm 210$   $^{14}\text{C}$  yr (rounded following Stuiver and Polach (1977)).

## Supplement S2. Simulating of the influence of multi-specimen sample size upon the concealment of age-depth reversals

AMS and other forms of mass spectrometry analysis report only a mean value and machine measurement error for a particular sample, whereby no information on actual intra-sample heterogeneity is provided. When the machine measurement error is smaller than the actual intra-sample heterogeneity, the latter is concealed from the researcher. An increasing number of specimens within a multi-specimen sample from a discrete core depth can cause a sample from a given core depth interval increases the likelihood that the sample's mean will age to regress towards a particular mean age for that depth interval. We simulate eight different core scenarios in Fig. S2, with two different simulated PDSM intensities (high and low) and four different multi-specimen sample sizes (random picking of specimens to test sample sizes of  $n = 1, 5, 10$  and  $100$  specimens). In each case the average age of the multi-specimen sample is calculated. We note that when the multi-specimen sample size consists of 10 specimens or more, both the high and low PDSM scenarios show downcore average age values that are in chronological order, i.e. no age-depth outliers are present. Mass spectrometry analysis of foraminifera has traditionally required between tens (Metcalfe et al., 2015; Waelbroeck et al., 2005) and hundreds (Hughen et al., 2006) of foraminifera specimens to establish a successful measurement. In other words, researchers applying the longstanding age-depth model method to sediment cores similar to those simulated in Fig. S2 would not be able to discern from the age-depth model results whether or not significant PDSM is present, with consequences for any subsequent temporal paleoclimate interpretations.

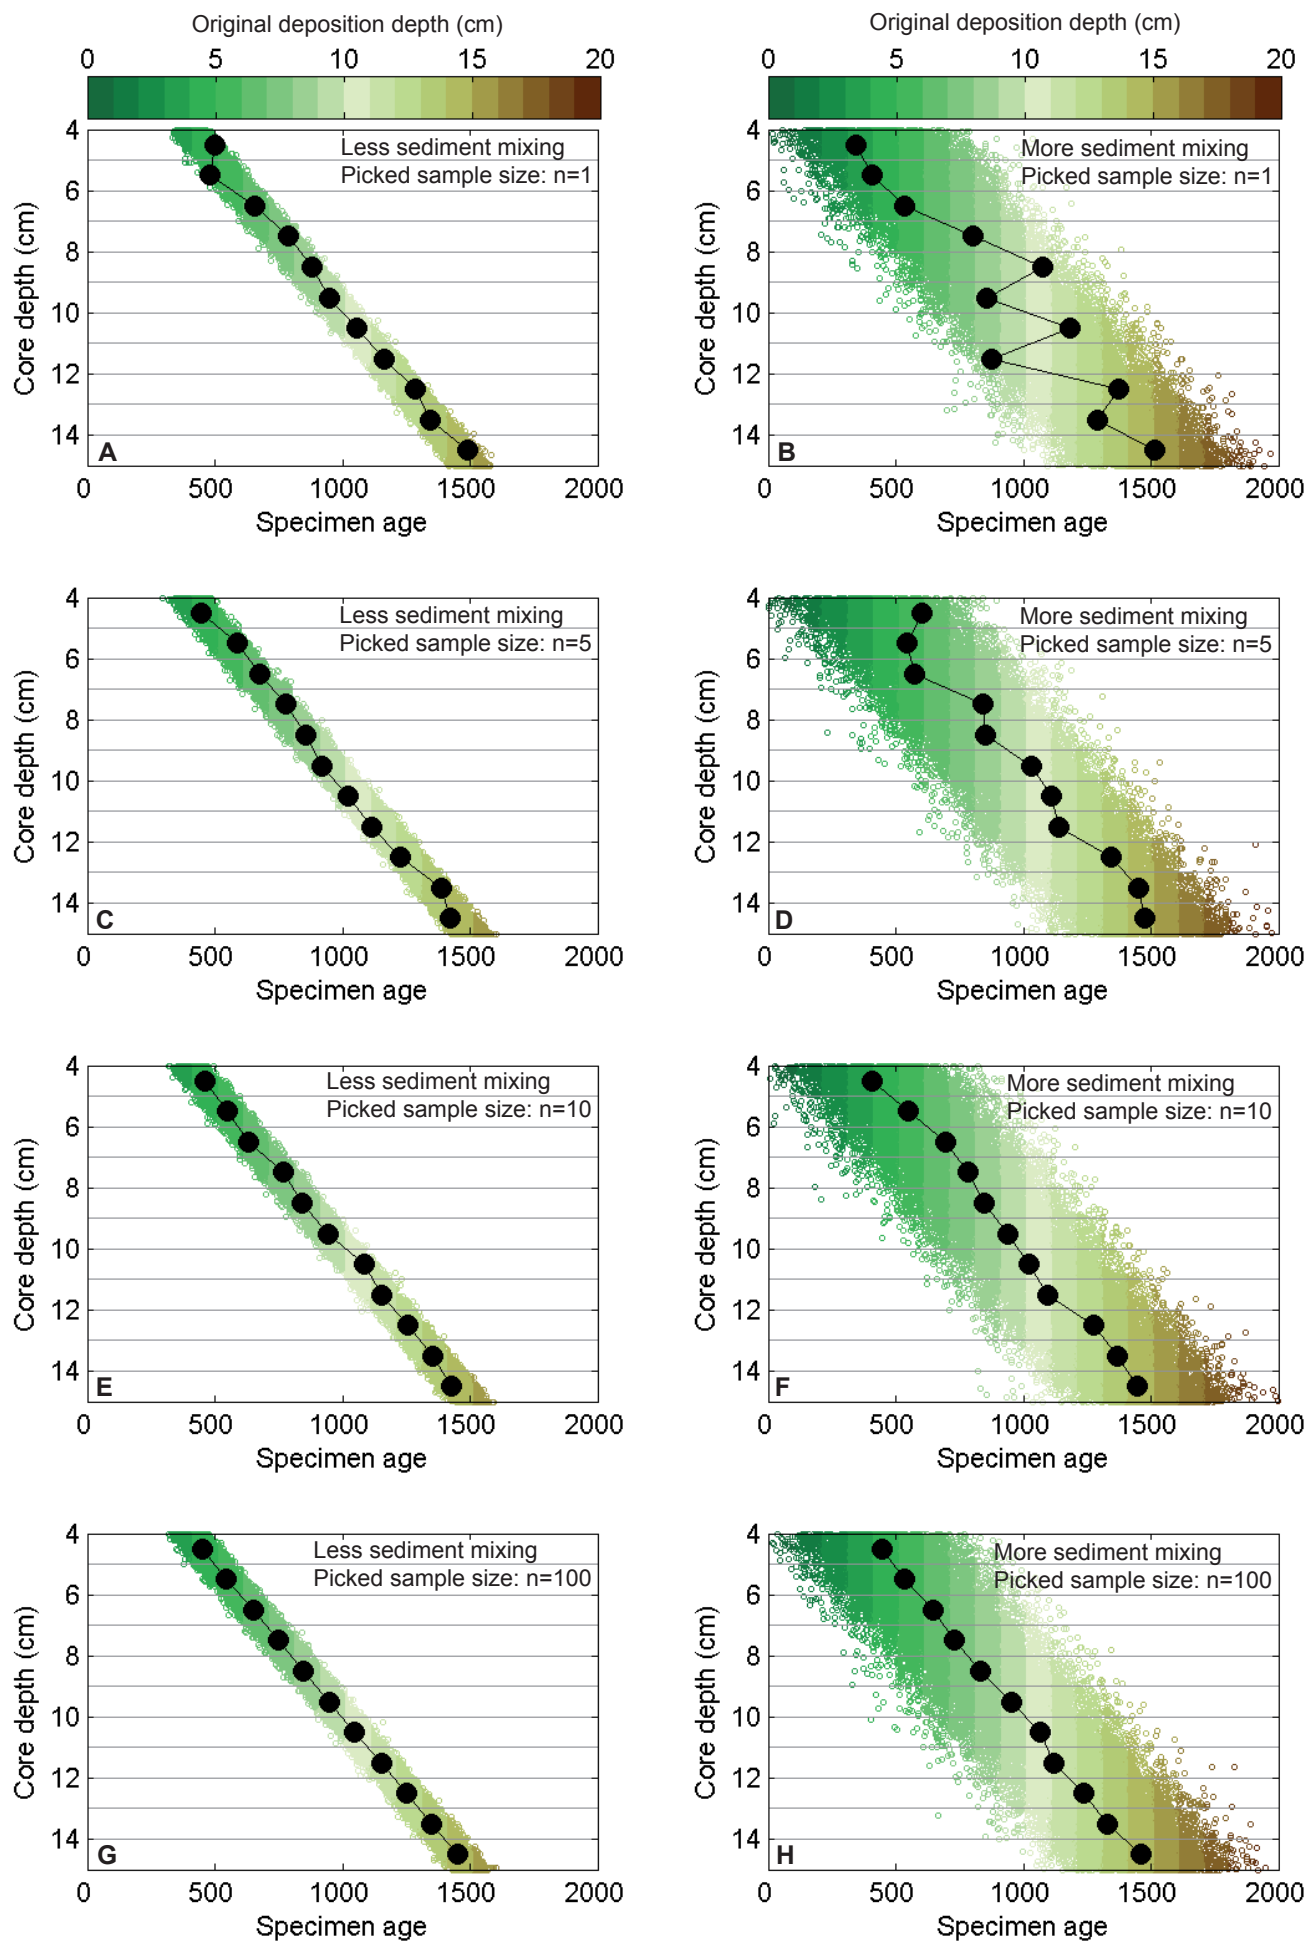

**Fig. S2.** Eight computer generated sediment core scenarios, each with  $5 \cdot 10^4$  synthetic single specimen foraminifera (open circles shading from green to brown) deposited with a linear sedimentation rate of 10 cm/ka. Gaussian noise has been added to simulate PDSM of the core material. For each 1 cm discrete depth interval (indicated by horizontal grey lines) in each scenario the average age value of  $n$  number of randomly picked synthetic foraminifera has been calculated (filled black circle). (A): Less vertical mixing,  $n=1$ . (B): More vertical mixing,  $n=1$ . (C): Less vertical mixing,  $n=5$ . (D): More vertical mixing,  $n=5$ . (E): More vertical mixing,  $n=10$ . (F): More vertical mixing,  $n=10$ . (G): More vertical mixing,  $n=100$ . (H): More vertical mixing,  $n=100$ .

**Supplement S3. Post-depositional ranking change of single foraminifera vs foraminifera weight**

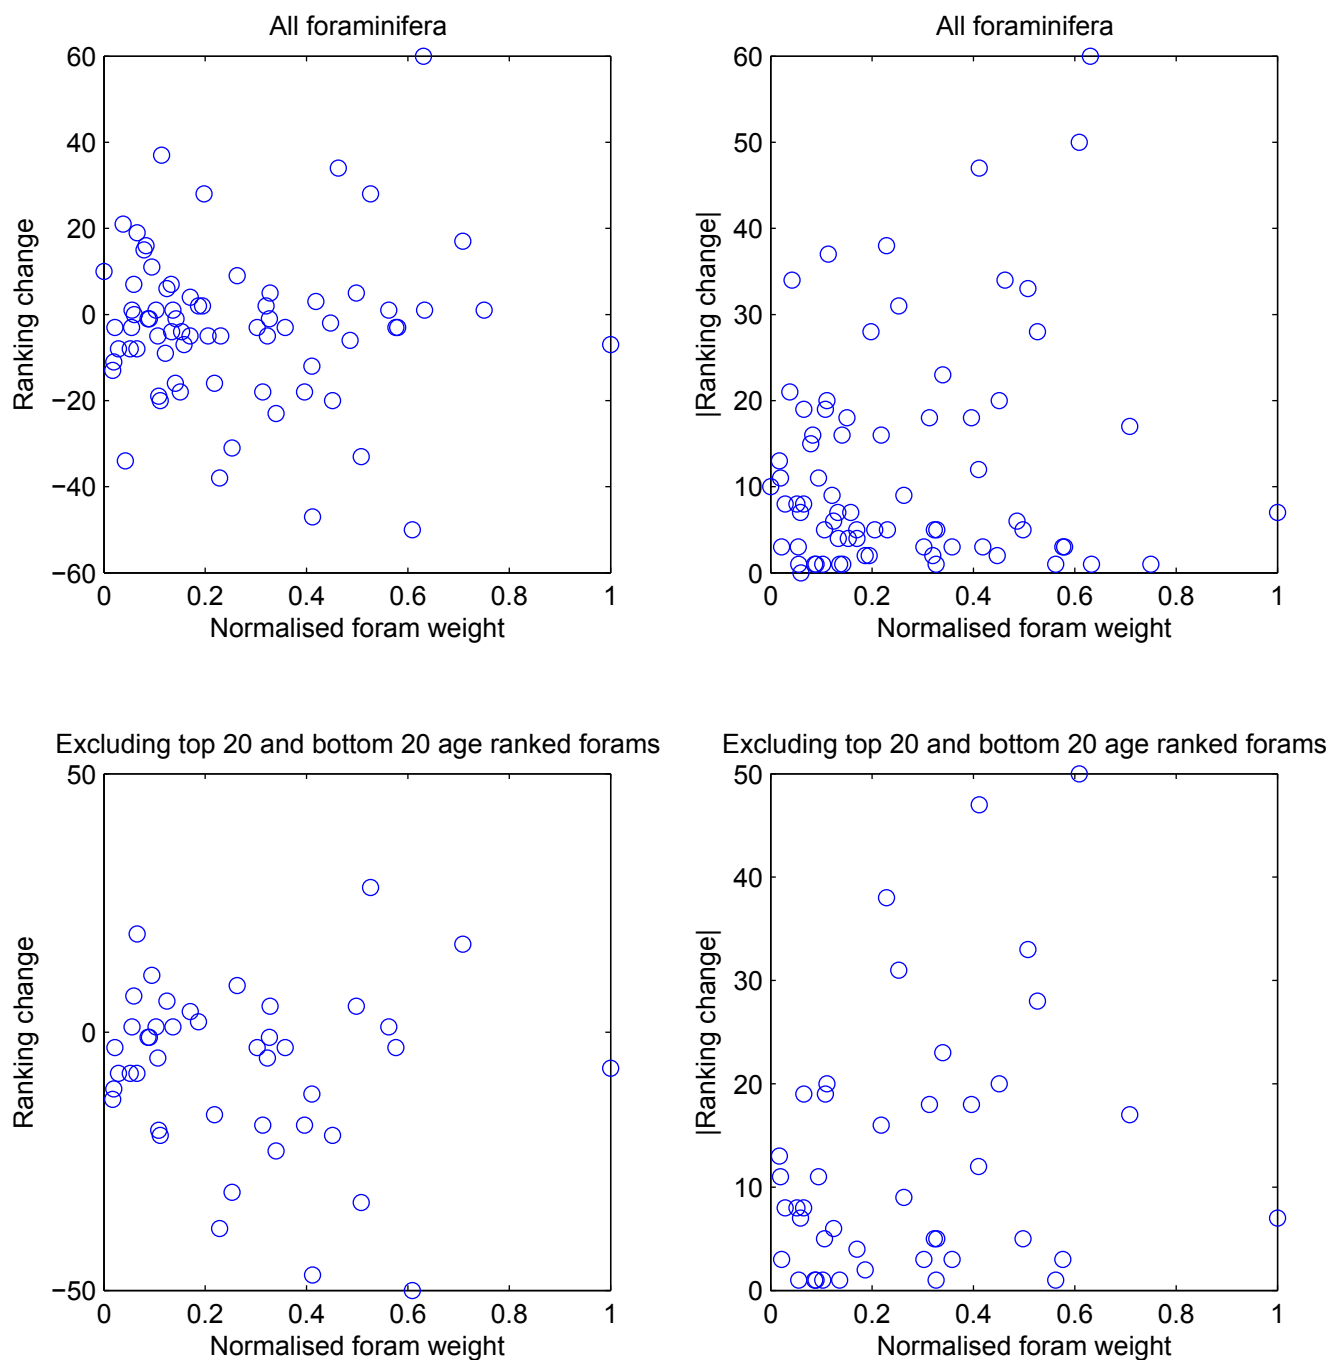

**Fig. S3.** Change in foraminifera ranking (as presented in Fig. 3) plotted against normalised (between 0 and 1) foraminifera weight. (A): Ranking change vs normalised foraminifera weight for all foraminifera. (B): Absolute value of ranking change vs normalised foraminifera weight for all foraminifera. (C): Ranking change vs normalised foraminifera weight, whereby the 20 oldest and 20 youngest foraminifera have been excluded. (D): Absolute value of ranking change vs normalised foraminifera, whereby the 20 oldest and 20 youngest foraminifera have been excluded.
